# Supplementary material
Source: Royal Society of Chemistry journal article supplement (doi:10.1039/d6cy00230g)
Supplement: d6cy00230g1.pdf [file d6cy00230g1.pdf]

Supporting information

**Modulating local pH environment in ZnO-Ce<sub>x</sub> catalysts for efficient  
neutral H<sub>2</sub>O<sub>2</sub> electrosynthesis**

Yuxiang Zhang <sup>a, b</sup>, Zibo Geng <sup>a</sup>, Hao Zheng <sup>a</sup>, Yue Lu <sup>a</sup>, Xinyu Shan <sup>a</sup>, Xinxian Zhu <sup>a</sup>,

Shan Ding <sup>a\*</sup>

<sup>a</sup> Anhui Province Key Laboratory of Conservation and Utilization for Dabie Mountain  
Special Bio-Resources, West Anhui University, Lu'an, 237012, Anhui, China

<sup>b</sup> Key Laboratory for Soft Chemistry and Functional Materials (Ministry of Education),  
School of Chemistry and Chemical Engineering, Nanjing University of Science and  
Technology, Ministry of Education, Nanjing, 210094, China

\*Corresponding e-mail: [shan.ding@wxc.edu.cn](mailto:shan.ding@wxc.edu.cn) (S.D.)

## **I. Experiment section**

### **1. Physical characterizations**

The morphology of the samples was examined with a ZEISS GeminiSEM 300 field-emission scanning electron microscope (SEM). Microstructural details were further analysed by transmission electron microscopy (TEM) and high-resolution TEM (HRTEM) using an FEI Talos F200X G2 instrument at an accelerating voltage of 300 kV. Crystal structure was determined by X-ray diffraction (XRD) on a Bruker D8 ADVANCE diffractometer with Cu K $\alpha$  radiation ( $\lambda = 1.5418 \text{ \AA}$ ), operating at 40 kV and 40 mA. Surface chemical composition and states were investigated by X-ray photoelectron spectroscopy (XPS) on a Thermo Scientific K-Alpha spectrometer (Al K $\alpha$  source, 1486.6 eV), with survey scans ranging from 0 to 1400 eV. Fourier transform infrared (FT-IR) spectra were acquired using a Thermo Scientific Nicolet iS5 spectrophotometer, and ultraviolet-visible (UV-vis) absorption spectra were recorded on a TU-1950 spectrophotometer. *In situ* attenuated total reflection surface-enhanced infrared absorption spectroscopy (ATR-SEIRAS) were collected on a Bruker INVENIO instrument equipped with an accessory and a CHI1140C electrochemical workstation. All electrochemical tests were conducted in a standard three-electrode configuration using a CHI660E electrochemical workstation equipped with a high-current amplifier.

### **2. Electrochemical characterization using a rotating ring-disk electrode (RRDE)**

All rotating ring-disk electrode (RRDE) measurements were carried out with a four-electrode electrochemical workstation (CHI 660E). The RRDE tip consisted of a glassy

carbon disk and a platinum ring. To prepare the working electrode, a catalyst ink was first formulated by ultrasonically dispersing 5 mg of catalyst for 1 hour in a mixture containing 750  $\mu\text{L}$  isopropanol (99%), 210  $\mu\text{L}$  deionized water, and 40  $\mu\text{L}$  of 5 wt% Nafion solution. Then, 5  $\mu\text{L}$  of the homogeneous ink was drop-cast onto the disk surface. A carbon rod and an Ag/AgCl electrode (saturated KCl) were used as the counter and reference electrodes, respectively. All measured potentials were converted to the reversible hydrogen electrode (RHE) scale using the equation:

$$E_{\text{RHE}} = E_{\text{Ag/AgCl}} + 0.059 \text{ pH} + 0.197$$

The oxygen reduction reaction (ORR) activity was assessed via linear sweep voltammetry (LSV) at a scan rate of 5  $\text{mV s}^{-1}$  and a rotation speed of 1600 rpm to evaluate  $\text{H}_2\text{O}_2$  production at the disk<sup>1,2</sup>. Before data collection, the working electrode was stabilized by repeated potential cycling until a steady current response was obtained.

The  $\text{H}_2\text{O}_2$  selectivity (%) was calculated by the following equation:

$$\text{H}_2\text{O}_2(\%) = \frac{2 \times \frac{i_r}{N}}{|i_d| + \frac{i_r}{N}} \times 100\%$$

The electron transfer number ( $n$ ) was calculated by the following equation:

$$n = \frac{4 \times |i_d|}{|i_d| + i_r/N}$$

Where  $i_d$  and  $i_r$  denote the disk current and ring currents, respectively, and  $N$  represents the RRDE collection efficiency, which was experimentally determined to be 0.37.

### 3. Flow cell electrolysis and H<sub>2</sub>O<sub>2</sub> quantification

The working electrode for flow cell experiments was prepared by spray-coating a catalyst ink onto a gas diffusion layer (GDL). The ink was obtained by ultrasonically dispersing 5 mg of catalyst and 50  $\mu$ L of 5 wt% Nafion solution in 950  $\mu$ L of isopropanol for one hour. The catalyst loading was controlled at 0.2 mg cm<sup>-2</sup>. Electrochemical tests were conducted in a custom flow cell, with the catalyst-coated GDL as the working electrode, an IrO<sub>2</sub> plate as the counter electrode, and an Ag/AgCl electrode (saturated KCl) as the reference. The electrolyte in both compartments was 0.5 M K<sub>2</sub>SO<sub>4</sub> solution.

The concentration of H<sub>2</sub>O<sub>2</sub> produced at the cathode was quantified using a titanium sulfate colorimetric method<sup>3, 4</sup>. This assay is based on the formation of a yellow peroxotitanium complex, the absorbance of which at 408 nm was measured by UV-vis spectroscopy. The measured absorbance was correlated with a pre-established calibration curve (Fig. S2) to determine the H<sub>2</sub>O<sub>2</sub> concentration.

The yield rate of H<sub>2</sub>O<sub>2</sub> ( $Y$ , mol g<sub>cat</sub><sup>-1</sup> h<sup>-1</sup>) was calculated as follows:

$$Y = \frac{c(H_2O_2) \times V}{M \times t \times s \times m_{cat}}$$

The Faradaic efficiency (FE, %) was calculated as follows:

$$FE = \frac{2F \times c(H_2O_2) \times V}{34 \times \int_0^t I dt}$$

Where  $c(H_2O_2)$  represents H<sub>2</sub>O<sub>2</sub> concentration (mg L<sup>-1</sup>),  $V$  is electrolyte volume (L),  $M$  denotes the molar mass of H<sub>2</sub>O<sub>2</sub> (34 g mol<sup>-1</sup>),  $m_{cat}$  is catalyst loading (mg cm<sup>-2</sup>),

$s$  is the electrode area ( $\text{cm}^2$ ),  $F$  denotes the Faraday constant ( $96485 \text{ C mol}^{-1}$ ), the

integral  $\int_0^t I dt$  corresponds to the total charge passed,  $t$  is electrolysis time (h).

#### 4. The measurement of local pHs by RRDE

Electrode potential exhibits pH sensitivity, thereby enabling the monitoring of pH variations at the working electrode surface<sup>5-7</sup>. In the present work, the pH at the catalyst surface was determined using the rotating ring-disk electrode (RRDE) technique. Specifically, the dependence of open-circuit potential ( $E_{oc}$ ) on electrolyte pH was quantified via the ring electrode of the RRDE. The relationship between  $E_{oc}$  and the pH at the ring electrode is described by the following equation:

$$E_{oc} = a \times \text{pH}_{\text{ring}} + b \quad (1)$$

Where  $a$  and  $b$  are derived from the linear fitting of  $E_{oc}$  against pH. Subsequently, the pH values at the catalyst surface were measured under different applied potentials. Linear sweep voltammetry (LSV) measurements were conducted on the RRDE-supported catalyst in electrolytes of varying pH, with the open-circuit potential of the ring electrode recorded.

## II. Supplementary Results

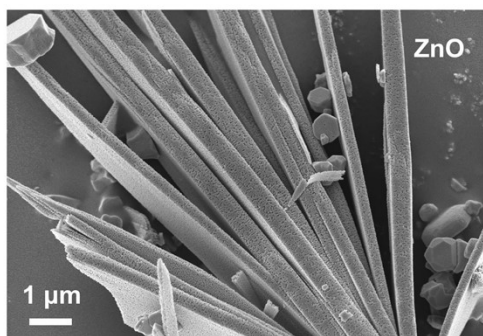

**Figure S1** Scanning electron microscopy (SEM) image of ZnO.

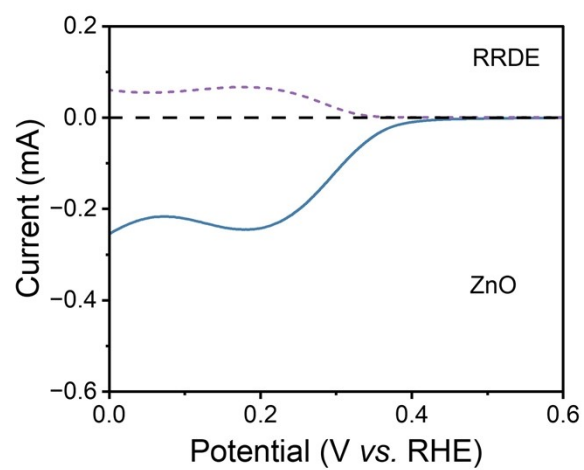

**Figure S2** LSV of ZnO in 0.5 M K<sub>2</sub>SO<sub>4</sub> by using RRDE.

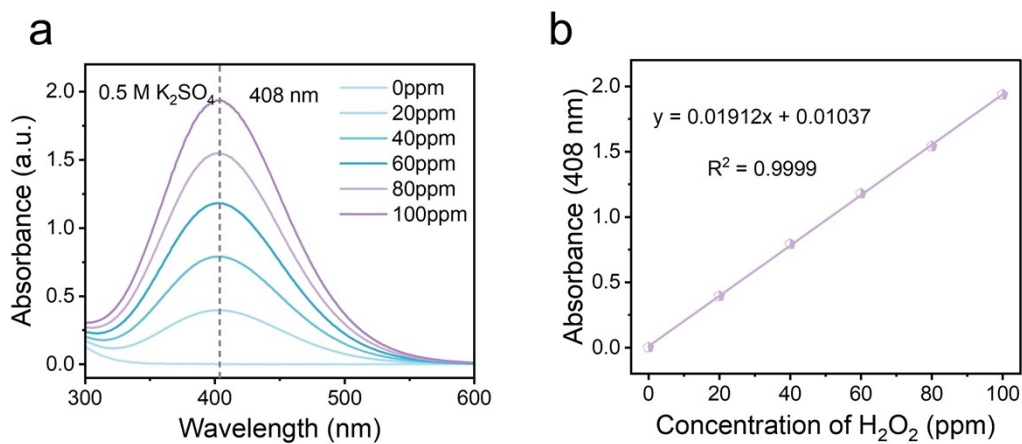

**Figure S3** The calibration curve for hydrogen peroxide was measured by a traditional titration method in 0.5 M  $K_2SO_4$  electrolyte. (a) The standard UV-Vis adsorption spectra of  $H_2TiO_4$  with different  $H_2O_2$  concentrations; (b) Calibration curve used for estimation of  $H_2O_2$  concentrations.

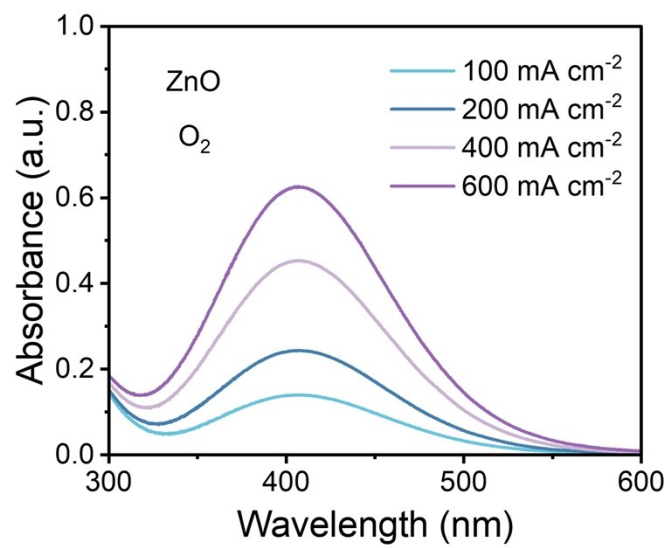

**Figure S4** The UV-vis spectra under chronopotentiometry test at different current densities for ZnO.

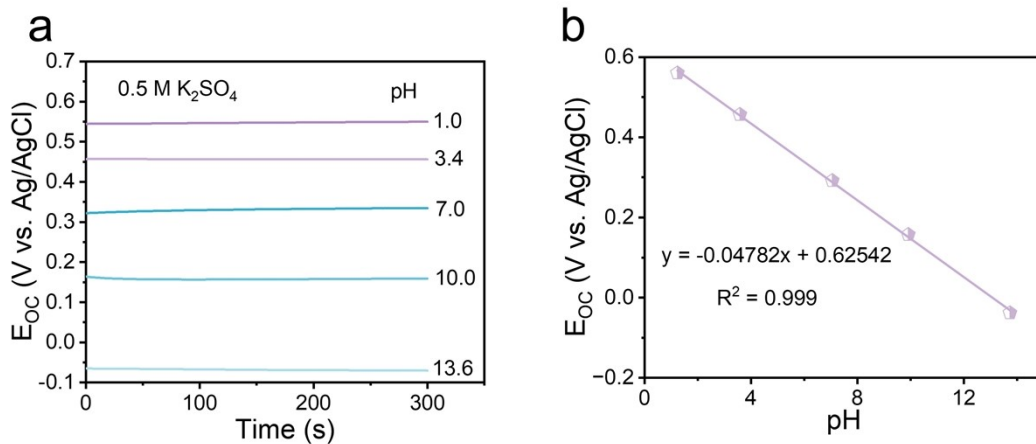

**Figure S5** The calibration curves for local pHs by using RRDE. (a) Elapse time and (b) pH dependence of open circuit potential ( $E_{oc}$ ) for Pt-ring electrode. The measurement was performed in K<sub>2</sub>SO<sub>4</sub>, and the pH of the electrolyte was changed by adding H<sub>2</sub>SO<sub>4</sub> or KOH.

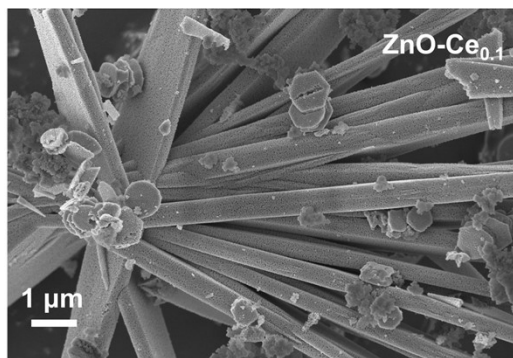

**Figure S6** Scanning electron microscopy (SEM) image of ZnO-Ce<sub>0.1</sub>.

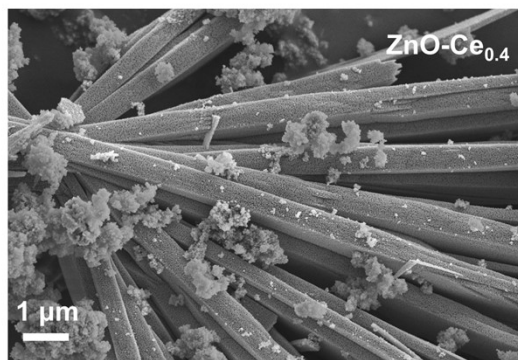

**Figure S7** Scanning electron microscopy (SEM) image of ZnO-Ce<sub>0.4</sub>.

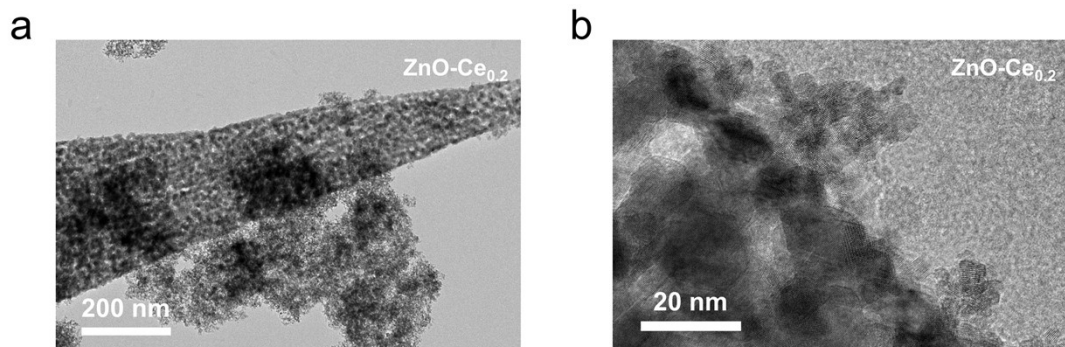

**Figure S8** Transmission electron microscopy (TEM) images of ZnO-Ce<sub>0.2</sub> (scale bar: 200 nm for a; 20 nm for b).

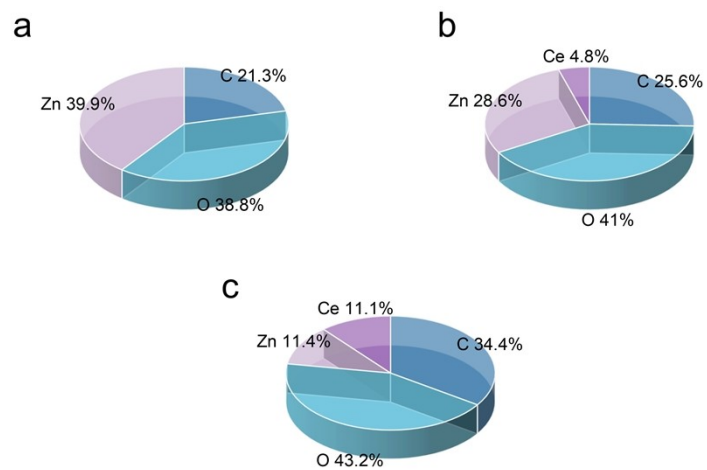

**Figure S9** Charts showing the percentages of C, O, Zn and Ce elements by XPS results.

(a) ZnO; (b) ZnO-Ce<sub>0.1</sub> and (c) ZnO-Ce<sub>0.4</sub>.

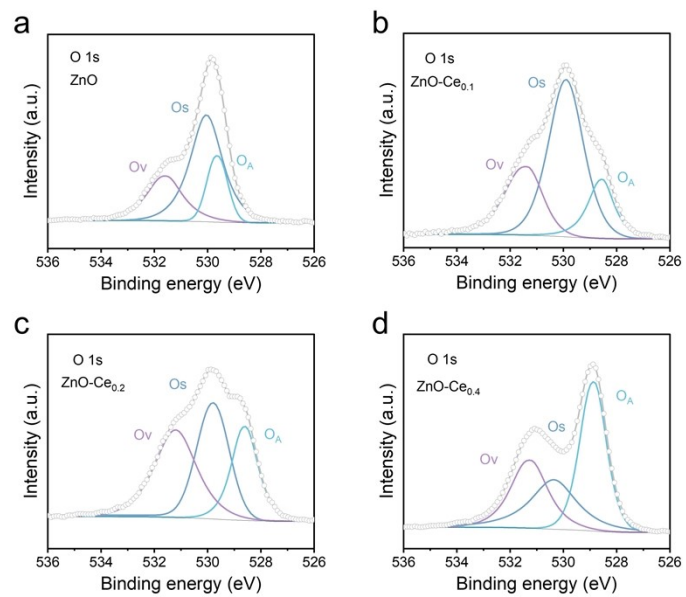

**Figure S10** High-resolution XPS spectrums of O 1s. (a) ZnO; (b) ZnO-Ce<sub>0.1</sub>; (c) ZnO-Ce<sub>0.2</sub> and (d) ZnO-Ce<sub>0.4</sub>.

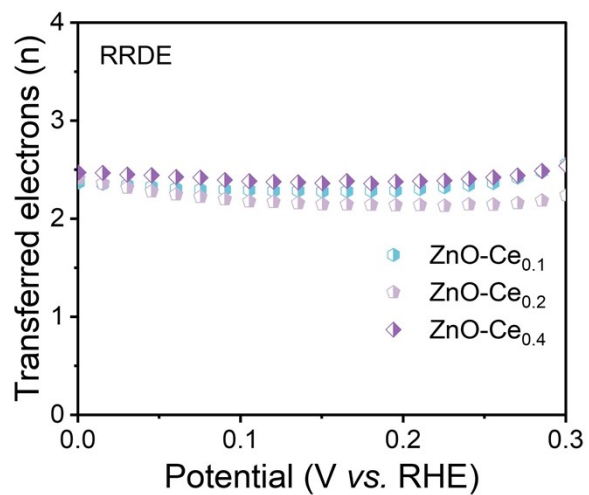

**Figure S11** Electron transfer number (n) for ZnO-Ce<sub>0.1</sub>, ZnO-Ce<sub>0.2</sub> and ZnO-Ce<sub>0.4</sub> tested in RRDE.

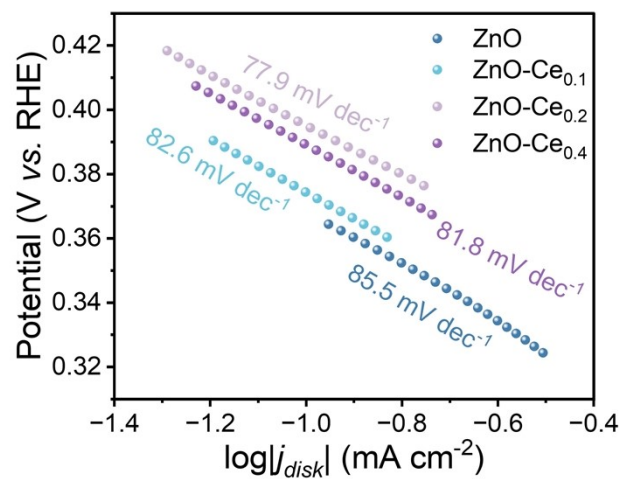

**Figure S12** The Tafel slopes for ZnO, ZnO-Ce<sub>0.1</sub>, ZnO-Ce<sub>0.2</sub> and ZnO-Ce<sub>0.4</sub>.

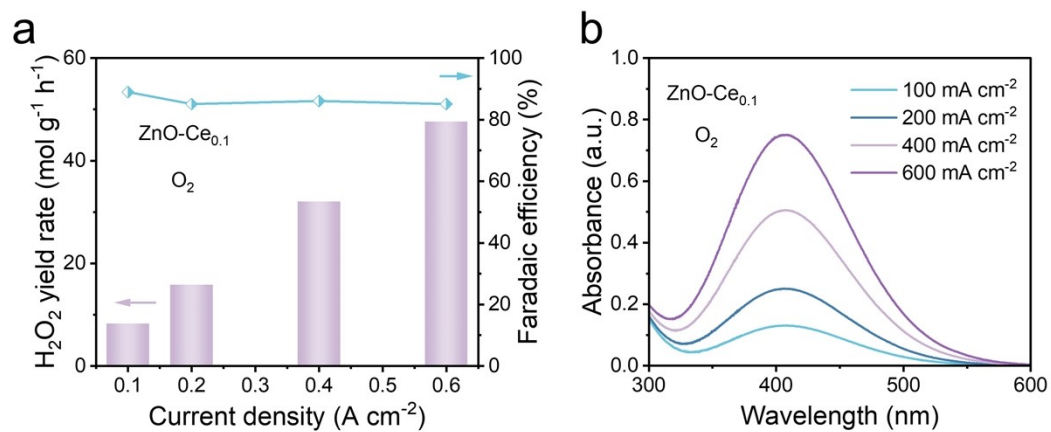

**Figure S13** The 2e<sup>-</sup> ORR performance of ZnO-Ce<sub>0.1</sub> in flow cell (under O<sub>2</sub>). (a) The H<sub>2</sub>O<sub>2</sub> yield rates and Faradaic efficiencies calculated by chronopotentiometry test; (b) The UV-vis spectra under chronopotentiometry test at different current densities.

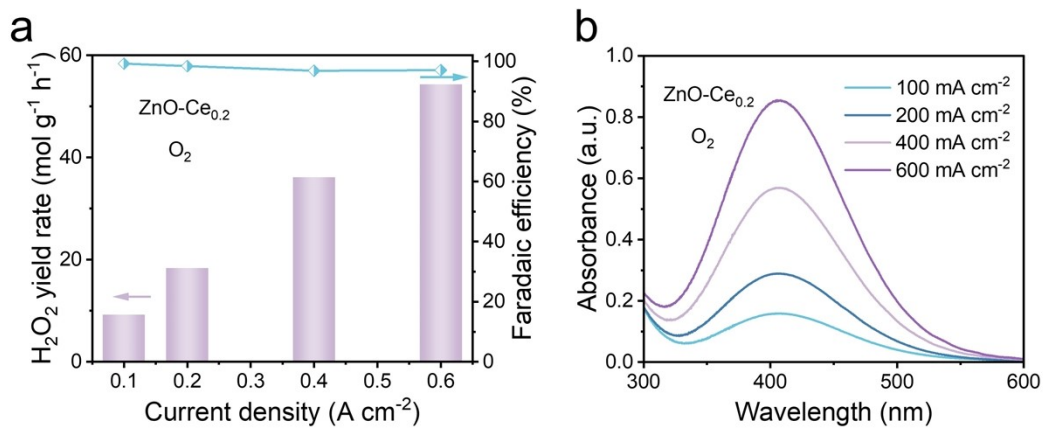

**Figure S14** The 2e<sup>-</sup> ORR performance of ZnO-Ce<sub>0.2</sub> in flow cell (under O<sub>2</sub>). (a) The H<sub>2</sub>O<sub>2</sub> yield rates and Faradaic efficiencies calculated by chronopotentiometry test; (b) The UV-vis spectra under chronopotentiometry test at different current densities.

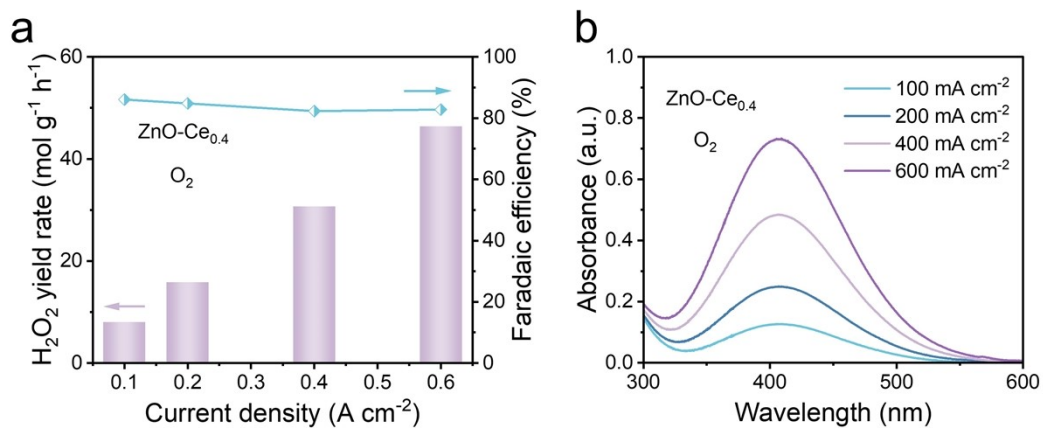

**Figure S15** The 2e<sup>-</sup> ORR performance of ZnO-Ce<sub>0.4</sub> in flow cell (under O<sub>2</sub>). (a) The H<sub>2</sub>O<sub>2</sub> yield rates and Faradaic efficiencies calculated by chronopotentiometry test; (b) The UV-vis spectra under chronopotentiometry test at different current densities.

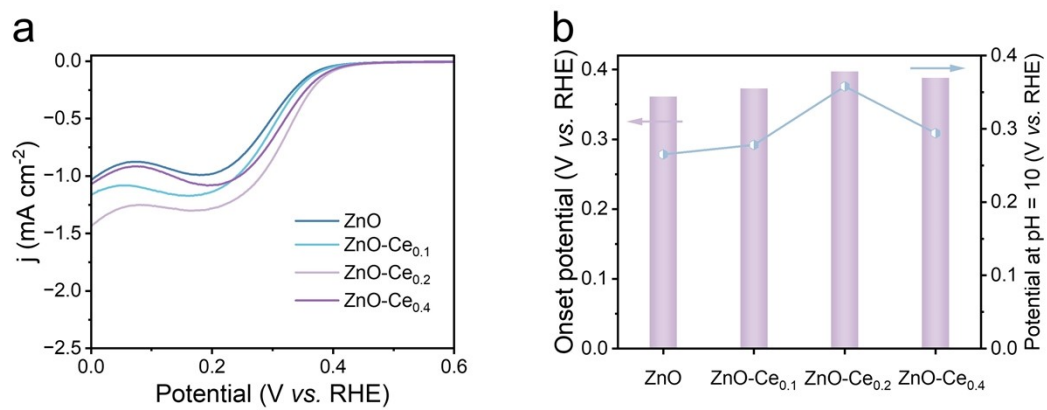

**Figure S16** (a) The disk current densities tested by RRDE; (b) The relationship between the onset potential of 2e-ORR and local pH.

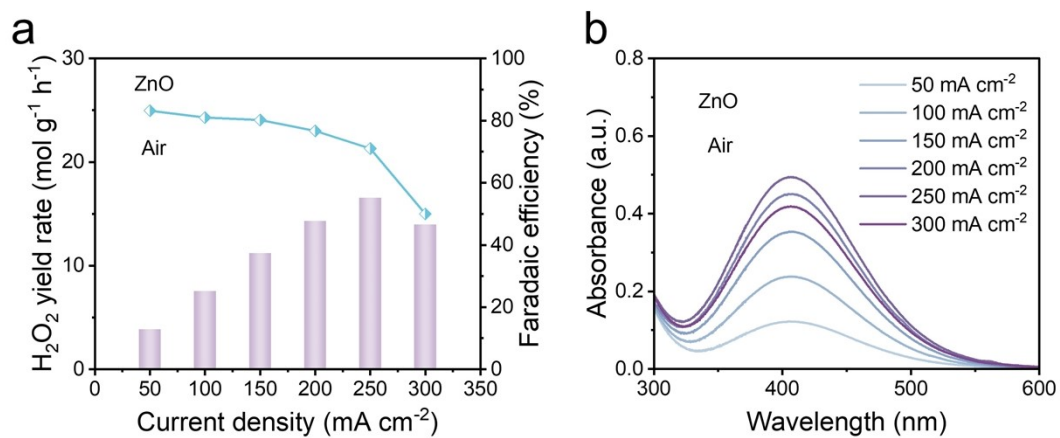

**Figure S17** The air-to-H<sub>2</sub>O<sub>2</sub> performance of ZnO in flow cell. (a) The H<sub>2</sub>O<sub>2</sub> yield rates and Faradaic efficiencies calculated by chronopotentiometry test; (b) The UV-vis spectra under chronopotentiometry test at different current densities.

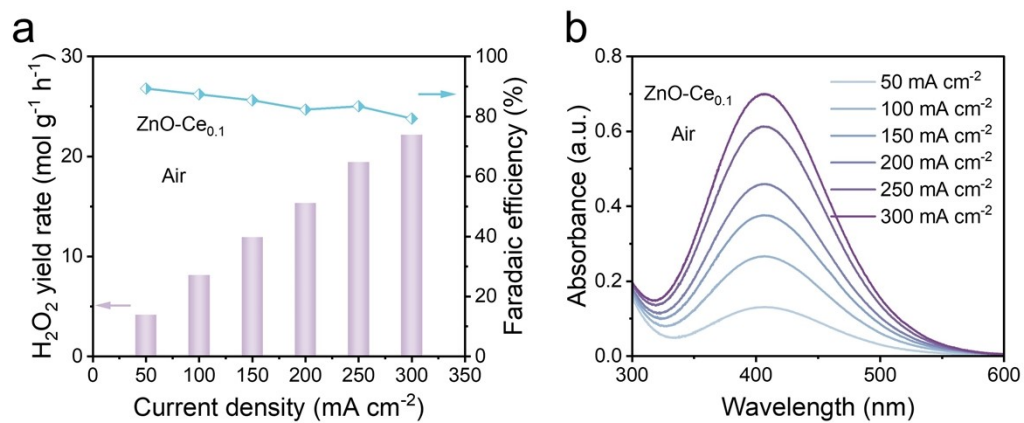

**Figure S18** The air-to-H<sub>2</sub>O<sub>2</sub> performance of ZnO-Ce<sub>0.1</sub> in flow cell. (a) The H<sub>2</sub>O<sub>2</sub> yield rates and Faradaic efficiencies calculated by chronopotentiometry test; (b) The UV-vis spectra under chronopotentiometry test at different current densities.

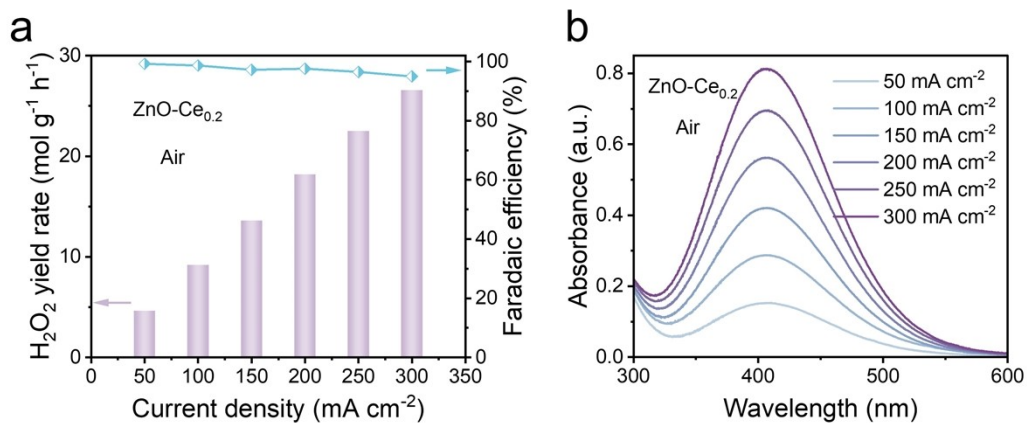

**Figure S19** The air-to-H<sub>2</sub>O<sub>2</sub> performance of ZnO-Ce<sub>0.2</sub> in flow cell. (a) The H<sub>2</sub>O<sub>2</sub> yield rates and Faradaic efficiencies calculated by chronopotentiometry test; (b) The UV-vis spectra under chronopotentiometry test at different current densities.

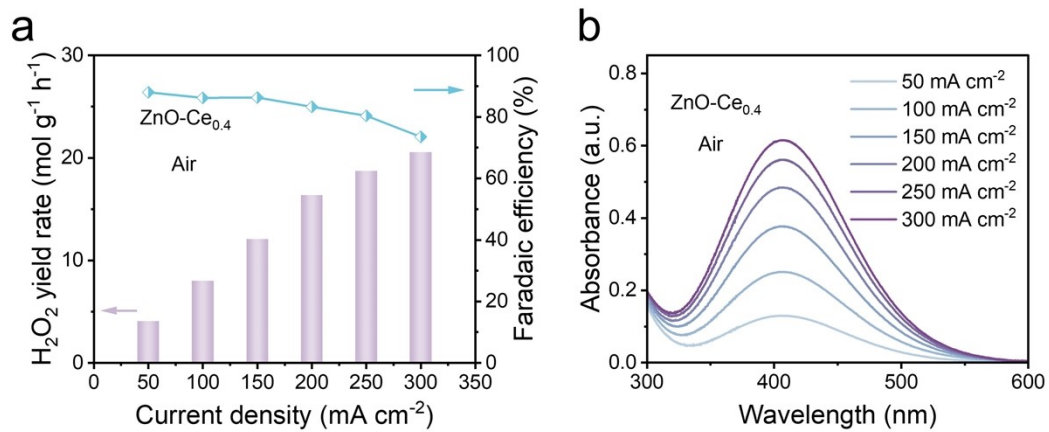

**Figure S20** The air-to-H<sub>2</sub>O<sub>2</sub> performance of ZnO-Ce<sub>0.4</sub> in flow cell. (a) The H<sub>2</sub>O<sub>2</sub> yield rates and Faradaic efficiencies calculated by chronopotentiometry test; (b) The UV-vis spectra under chronopotentiometry test at different current densities.

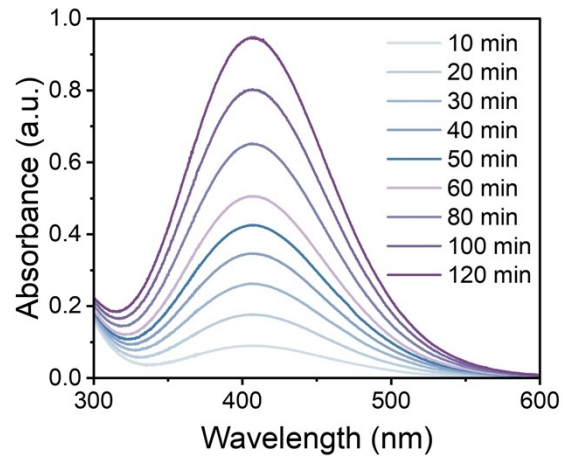

**Figure S21** The corresponding UV-vis spectra of the cumulative H<sub>2</sub>O<sub>2</sub> concentration of ZnO-Ce<sub>0.2</sub> electrode.

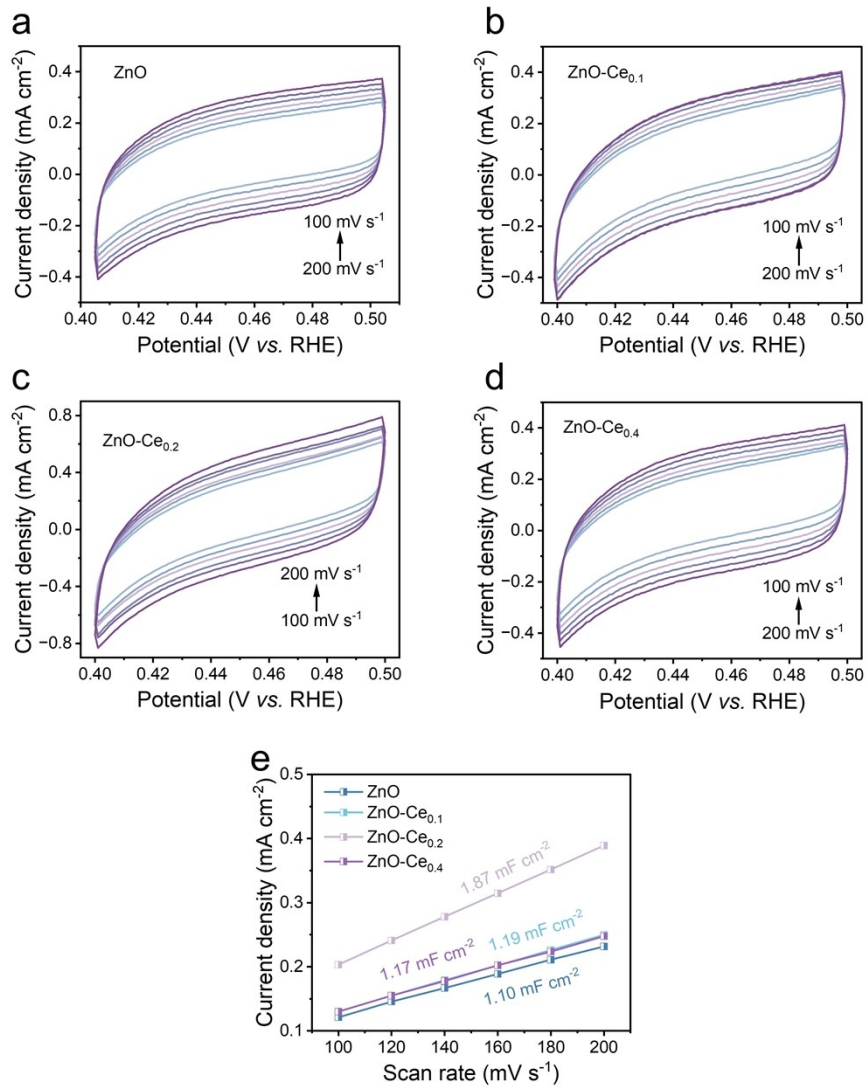

**Figure S22** CVs measured at different scan rates from 100 to 200  $\text{mV s}^{-1}$ . (a) ZnO; (b) ZnO-Ce<sub>0.1</sub>; (c) ZnO-Ce<sub>0.2</sub> and ZnO-Ce<sub>0.4</sub> (d); (e) Capacitance of the electric double layer probed under neutral-pH conditions.

**Table S1** The comparison of Faradaic efficiencies (%) of ZnO-Ce<sub>0.2</sub> with other counterparts under O<sub>2</sub> atmosphere in neutral electrolyte ( $\pm 5\%$ ).

| <b>Current density (mA cm<sup>-2</sup>)</b> | <b>ZnO</b> | <b>ZnO-Ce<sub>0.1</sub></b> | <b>ZnO-Ce<sub>0.2</sub></b> | <b>ZnO-Ce<sub>0.4</sub></b> |
|---------------------------------------------|------------|-----------------------------|-----------------------------|-----------------------------|
| 100                                         | 77.4       | 89.0                        | 99.2                        | 86.1                        |
| 200                                         | 82.8       | 85.1                        | 98.4                        | 84.8                        |
| 400                                         | 77.1       | 86.2                        | 96.9                        | 82.3                        |
| 600                                         | 70.9       | 85.1                        | 97.1                        | 82.8                        |

**Table S2** The comparison of H<sub>2</sub>O<sub>2</sub> yield rates (mol g<sub>cat</sub><sup>-1</sup> h<sup>-1</sup>) of ZnO-Ce<sub>0.2</sub> with other counterparts under O<sub>2</sub> atmosphere in neutral electrolyte (±5%).

| <b>Current</b>          |            |                             |                             |                             |
|-------------------------|------------|-----------------------------|-----------------------------|-----------------------------|
| <b>density (mA</b>      | <b>ZnO</b> | <b>ZnO-Ce<sub>0.1</sub></b> | <b>ZnO-Ce<sub>0.2</sub></b> | <b>ZnO-Ce<sub>0.4</sub></b> |
| <b>cm<sup>-2</sup>)</b> |            |                             |                             |                             |
| 100                     | 7.22       | 8.29                        | 9.25                        | 8.03                        |
| 200                     | 15.45      | 15.87                       | 18.35                       | 15.82                       |
| 400                     | 28.74      | 32.07                       | 36.12                       | 30.69                       |
| 600                     | 39.65      | 47.62                       | 54.29                       | 46.35                       |

**Table S3** The comparison of Faradaic efficiencies (%) of ZnO-Ce<sub>0.2</sub> with other counterparts under air atmosphere in neutral electrolyte ( $\pm 5\%$ ).

| <b>Current density (mA cm<sup>-2</sup>)</b> | <b>ZnO</b> | <b>ZnO-Ce<sub>0.1</sub></b> | <b>ZnO-Ce<sub>0.2</sub></b> | <b>ZnO-Ce<sub>0.4</sub></b> |
|---------------------------------------------|------------|-----------------------------|-----------------------------|-----------------------------|
| 50                                          | 83.2       | 89.3                        | 99.2                        | 88.0                        |
| 100                                         | 81.0       | 87.4                        | 98.7                        | 86.2                        |
| 150                                         | 80.2       | 85.4                        | 97.2                        | 86.3                        |
| 200                                         | 76.7       | 82.3                        | 97.6                        | 83.3                        |
| 250                                         | 71.0       | 83.4                        | 96.5                        | 80.4                        |
| 300                                         | 50.0       | 79.3                        | 95.0                        | 73.5                        |

**Table S4** The comparison of H<sub>2</sub>O<sub>2</sub> yield rates (mol g<sub>cat</sub><sup>-1</sup> h<sup>-1</sup>) of ZnO-Ce<sub>0.2</sub> with other counterparts under air atmosphere in neutral electrolyte (±5%).

| <b>Current</b>          |            |                             |                             |                             |
|-------------------------|------------|-----------------------------|-----------------------------|-----------------------------|
| <b>density (mA</b>      | <b>ZnO</b> | <b>ZnO-Ce<sub>0.1</sub></b> | <b>ZnO-Ce<sub>0.2</sub></b> | <b>ZnO-Ce<sub>0.4</sub></b> |
| <b>cm<sup>-2</sup>)</b> |            |                             |                             |                             |
| 50                      | 3.87       | 4.16                        | 4.63                        | 4.09                        |
| 100                     | 7.54       | 8.14                        | 9.20                        | 8.03                        |
| 150                     | 11.22      | 11.93                       | 13.59                       | 12.07                       |
| 200                     | 14.31      | 15.34                       | 18.20                       | 16.36                       |
| 250                     | 16.55      | 19.44                       | 22.49                       | 18.73                       |
| 300                     | 13.97      | 22.18                       | 26.56                       | 20.55                       |

**Table S5** The comparison of ZnO-Ce<sub>0.2</sub> with state-of-the-art electrocatalysts towards 2e<sup>-</sup> ORR in neutral electrolyte.

| <b>Catalyst</b>                                         | <b>Atmosp here</b> | <b>Yield (mol g<sub>cat</sub><sup>-1</sup> h<sup>-1</sup>)</b> | <b>Faradaic efficiency (%)</b> | <b>Current density (mA cm<sup>-2</sup>)</b> | <b>Reference</b>                           |
|---------------------------------------------------------|--------------------|----------------------------------------------------------------|--------------------------------|---------------------------------------------|--------------------------------------------|
| <b>ZnO-Ce<sub>0.2</sub></b>                             | O <sub>2</sub>     | 54.29                                                          | 88.7                           | 600                                         | This work                                  |
|                                                         | Air                | 26.56                                                          | 90.9                           | 300                                         |                                            |
| <b>NC@700</b> <sup>8</sup>                              | O <sub>2</sub>     | 16.8                                                           | 95.8                           | 71                                          | Adv. Funct. Mater. 2024, 34, 2411457       |
| <b>Co@S-1</b> <sup>9</sup>                              | O <sub>2</sub>     | 11.56                                                          | 96                             | 129                                         | Angew. Chem. Int. Ed. 2025, 64, e202506390 |
| <b>Ni-BTA</b> <sup>10</sup>                             | O <sub>2</sub>     | 13.5                                                           | 80                             | 100                                         | Nat. Commun. 16 (2025) 4050                |
| <b>In-N<sub>2</sub>O<sub>2</sub>-P-mC</b> <sup>11</sup> | O <sub>2</sub>     | 22.54                                                          | 95                             | 250                                         | Angew. Chem. Int. Ed. 2025, 64, e202500177 |
| <b>ER-ZnO</b> <sup>12</sup>                             | Air                | 24.4                                                           | 89.3                           | 300                                         | Nat. Commun. 15 (2024) 4157                |
| <b>N, O-CNS<sub>0.5</sub></b> <sup>13</sup>             | O <sub>2</sub>     | 6.71                                                           | 90                             | 100                                         | Adv. Energy Mater. 2024, 14,               |

|                            |                |       |      |      |                                                |
|----------------------------|----------------|-------|------|------|------------------------------------------------|
|                            |                |       |      |      | 2304418                                        |
| <b>Pd/MCS-8</b>            |                |       |      |      | Angew. Chem. Int.                              |
| 14                         | O <sub>2</sub> | 15.77 | 88.7 | 245  | Ed. 2024, 63,<br>e202403023                    |
| <b>Ni-</b>                 |                |       |      |      | Angew. Chem. Int.                              |
| <b>TCPP(Co)</b>            | O <sub>2</sub> | 18.0  | 85   | 115  | Ed. 2024, 63,<br>e202408500                    |
| 15                         |                |       |      |      | Angew. Chem. Int.                              |
| <b>CBNO</b> <sup>16</sup>  | O <sub>2</sub> | 13.4  | 93   | 150  | Ed. 2024, 63,<br>e202317267                    |
| <b>L-ZnO</b> <sup>17</sup> | O <sub>2</sub> | 45.89 | 98   | 1000 | Energy Environ.<br>Sci., 2023,16,<br>3363–3372 |

---

## Supporting Reference

1. B.-H. Lee, H. Shin, A. S. Rasouli, et al., *Nat. Catal.*, 2023, **6**, 234–243.
2. G. V. Fortunato, A. Gunnarson, H. Hosseini, et al., *Adv. Funct. Mater.*, 2026, **36**, e16600.
3. Q. Li, Z. Nie, W. Wu, et al., *Adv. Mater.*, 2025, **37**, 2412039.
4. Q. Yang, W. Xu, S. Gong, et al., *Nat. Commun.*, 2020, **11**, 5478.
5. J. Guo, Y. Zheng, Z. Hu, et al., *Nat. Energy*, 2023, **8**, 264–272.
6. B. Xia, J. Du, M. Li, et al., *Adv. Mater.*, 2024, **36**, 2401641.
7. Y. Yokoyama, K. Miyazaki, Y. Kondo, et al., *Chem. Lett.* 2020, **49**, 195.
8. H. Xie, J. Fu, J. Liu, et al., *Adv. Funct. Mater.*, 2024, **34**, 2411457.
9. G. Yu, Y. Jin, Y. Zhou, et al., *Angew. Chem. Int. Ed.*, 2025, **64**, e202506390.
10. Z. Sang, Y. Qiao, R. Chen, et al., *Nat. Commun.*, 2025, **16**, 4050.
11. C. Qi, W. Bao, J. Xu, et al., *Angew. Chem. Int. Ed.*, 2025, **64**, e202500177.
12. Q. Huang, B. Xia, M. Li, et al., *Nat. Commun.*, 2024, **15**, 4157.
13. L. Jing, Q. Tian, W. Wang, et al., *Adv. Energy Mater.*, 2024, **14**, 2304418.
14. L. Jing, W. Wang, Q. Tian, et al., *Angew. Chem. Int. Ed.*, 2024, **63**, e202403023.
15. Z. Li, J. Jia, Z. Sang, et al., *Angew. Chem. Int. Ed.*, 2024, **63**, e202408500.
16. Z. Song, X. Chi, S. Dong, et al., *Angew. Chem. Int. Ed.*, 2024, **63**, e202317267.
17. S. Ding, B. Xia, M. Li, et al., *Energy Environ. Sci.*, 2023, **16**, 3363-3372.
